# Supplementary material for: Realizing the Ultralow Lattice Thermal Conductivity of Cu3SbSe4 Compound via Sulfur Alloying Effect
Source: MDPI journal article supplement (doi:10.3390/nano13192730), 2023-10-08
Supplement: s1 [file s1]

Supplementary materials for

## Realizing the Ultralow Lattice Thermal Conductivity of $\text{Cu}_3\text{SbSe}_4$ compound via Sulfur Alloying Effect

Lijun Zhao<sup>1</sup>, Haiwei Han<sup>1</sup>, Zhengping Lu<sup>1</sup>, Jian Yang<sup>2,\*</sup>, Xinmeng Wu<sup>1</sup>, Bangzhi Ge<sup>3</sup>,  
Lihua Yu<sup>1</sup>, Zhongqi Shi<sup>4</sup>, Abdalnasser M. Karami<sup>5</sup>, Songtao Dong<sup>1</sup>, Shahid Hussain<sup>2</sup>, Guanjun  
Qiao<sup>2</sup>, and Junhua Xu<sup>1,\*</sup>

<sup>1</sup>School of Materials Science and Engineering, Jiangsu University of Science and Technology,  
Zhenjiang 212100, China

<sup>2</sup>School of Materials Science and Engineering, Jiangsu University, Zhenjiang 212013, China

<sup>3</sup>State Key Laboratory of Solidification Processing, and Key Laboratory of Radiation  
Detection Materials and Devices, Ministry of Industry and Information Technology,  
Northwestern Polytechnical University, Xi'an 710072, China

<sup>4</sup>State Key Laboratory for Mechanical Behavior of Materials, Xi'an Jiaotong University,  
Xi'an 710049, China

<sup>5</sup>Department of Chemistry, College of Science, King Saud University, Riyadh 11451, Saudi  
Arabia

*\*Corresponding authors:*

[jyyangj@ujs.edu.cn](mailto:jyyangj@ujs.edu.cn) (J. Yang);

[jhxu@just.edu.cn](mailto:jhxu@just.edu.cn) (J.H. Xu)

## Theoretical methods

### 1. Calculations of Lorenz number ( $L$ ) and electrical thermal conductivity ( $\kappa_{ele}$ )

Measured  $D$  for pristine  $\text{Cu}_3\text{SbSe}_4$  and  $\text{Cu}_3\text{Sb}(\text{Se}_{1-x}\text{S}_x)_4$  ( $x=0.1-1$ ) samples are shown in Figure S4. The lattice thermal conductivity ( $\kappa_{\text{lat}}$ ) is obtained by subtracting electrical thermal conductivity ( $\kappa_{\text{ele}}$ ) from  $\kappa_{\text{tot}}$  using Wiedeman-Franz relationship [1].

$$\kappa_{\text{ele}} = L \sigma T \quad (\text{S1})$$

where  $L$  is the Lorenz number and it can be expressed as equation (2) [2,3].

$$L = 1.5 + \exp\left[\frac{-|S|}{116}\right] \quad (\text{S2})$$

The estimated Lorenz number of  $\text{Cu}_3\text{Sb}(\text{Se}_{1-x}\text{S}_x)_4$  ( $x=0-1$ ) samples are listed in Figure S5.

## Supporting figures

### 1. SEM, BSE and EDS spectrum of $\text{Cu}_3\text{Sb}(\text{Se}_{1-x}\text{S}_x)_4$ ( $x=0.3$ ) sample

The four constituent elements Cu, Sb, Se and S are uniformly distributed in the selected area (marked A), and the atomic ratio (%) of Cu, Sb, Se and S is 40.07: 12.68: 31.26: 15.59 (Figure S1c), demonstrating that the formation of a solid solution of  $\text{Cu}_3\text{SbSe}_4$ - $\text{Cu}_3\text{SbS}_4$  ( $x=0.3$ ), which is consistent with XRD results.

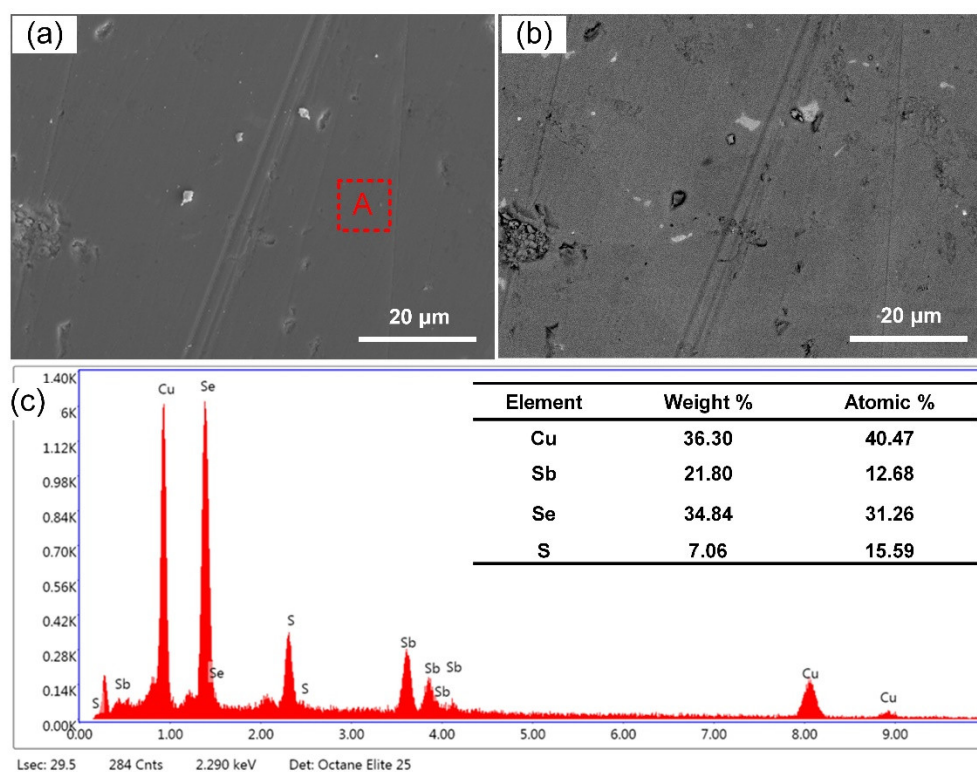

**Figure S1** (a) SEM, (b) BSE and (c) EDS spectrum of polished surface of  $\text{CuSbSe}_{2.8}\text{S}_{1.2}$  sample.

## 2. TEM morphology and EDS mapping images of $\text{Cu}_3\text{Sb}(\text{Se}_{1-x}\text{S}_x)_4$ ( $x=0.3$ ) sample.

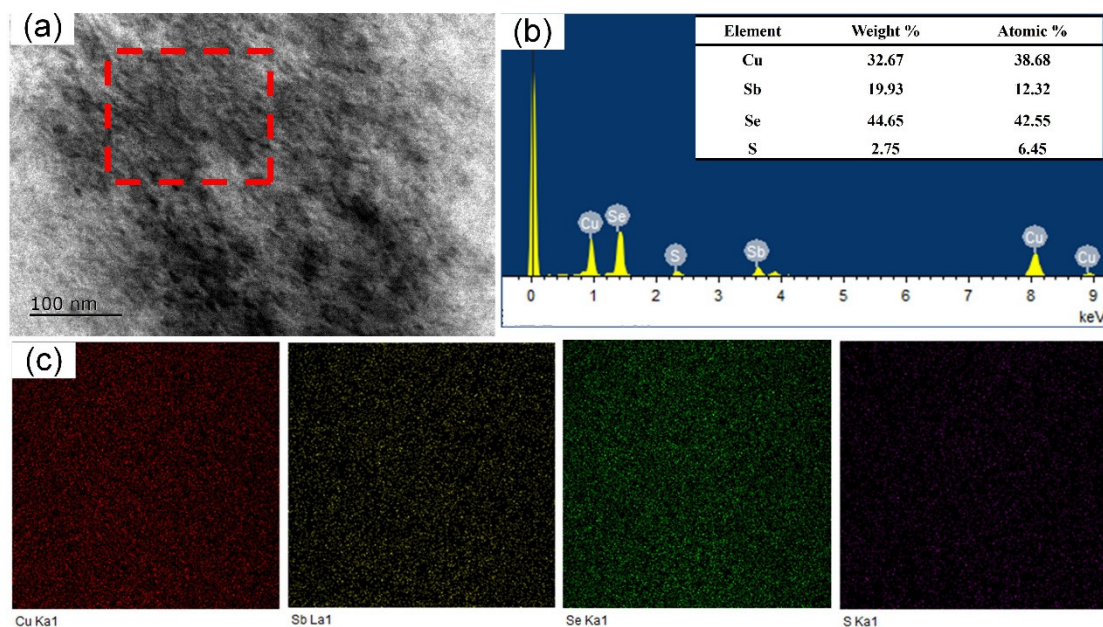

**Figure S2** TEM morphology images of  $\text{Cu}_3\text{SbSe}_{2.8}\text{S}_{1.2}$  sample.

## 3. Band gap ( $E_g$ ) of $\text{Cu}_3\text{Sb}(\text{Se}_{1-x}\text{S}_x)_4$ samples

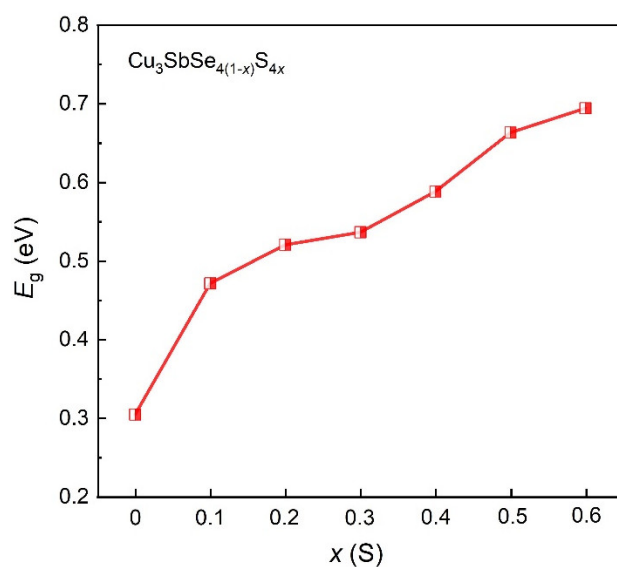

**Figure S3** Band gap ( $E_g$ ) of  $\text{Cu}_3\text{Sb}(\text{Se}_{1-x}\text{S}_x)_4$  ( $x=0-0.6$ ) samples.

#### 4. Measured $D$

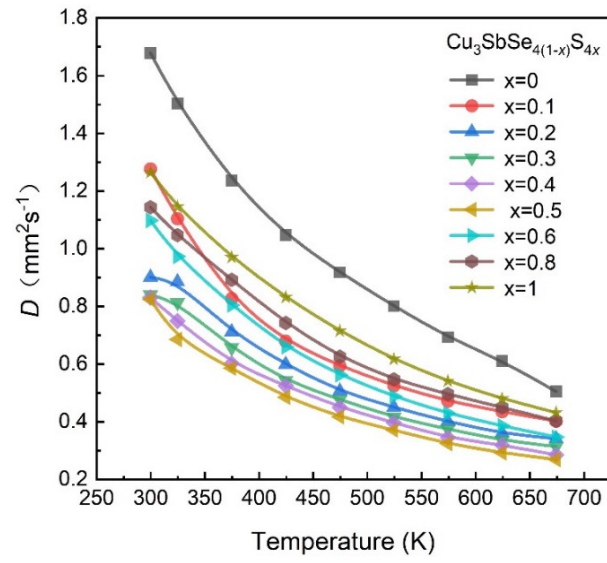

**Figure S4** Temperature-dependent  $D$  of  $\text{Cu}_3\text{Sb}(\text{Se}_{1-x}\text{S}_x)_4$  ( $x=0-1$ ) samples.

#### 5. Calculated $L$

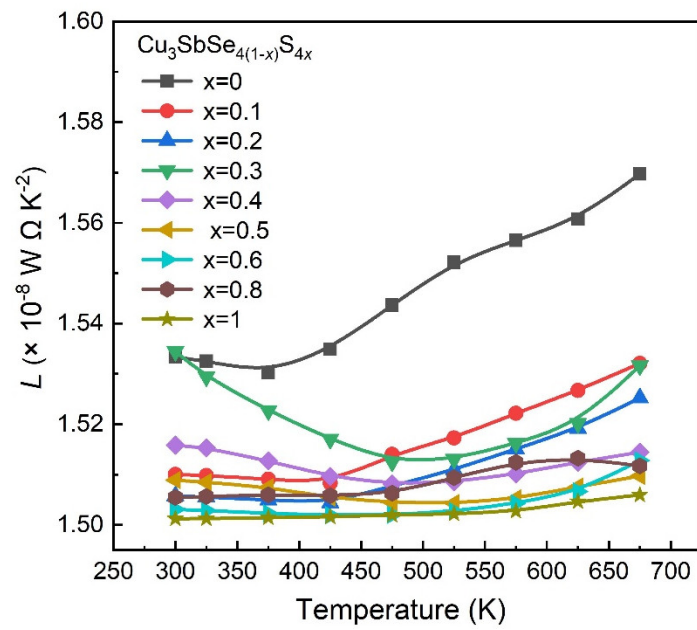

**Figure S5** Temperature-dependent Lorenz number ( $L$ ) of  $\text{Cu}_3\text{Sb}(\text{Se}_{1-x}\text{S}_x)_4$  ( $x=0-1$ ) samples.

## Supporting table

**Table S1** Relative density, carrier concentration, Hall mobility and carrier effective mass for  $\text{Cu}_3\text{SbSe}_{4(1-x)}\text{S}_{4x}$  ( $x=0-1$ ) samples at room temperature (300 K).

| Samples | Density<br>( $\text{gcm}^{-3}$ ) | Relative<br>density<br>(%) | Carrier<br>concentration<br>( $10^{18} \text{ cm}^{-3}$ ) | Hall<br>mobility<br>( $\text{cm}^2 \text{ V}^{-1} \text{ s}^{-1}$ ) | Carrier<br>effective<br>mass ( $m_e$ ) |
|---------|----------------------------------|----------------------------|-----------------------------------------------------------|---------------------------------------------------------------------|----------------------------------------|
| $x=0$   | 5.79                             | 98.8                       | 1.08                                                      | 62.2                                                                | 0.68                                   |
| $x=0.1$ | 5.53                             | 94.3                       | 1.55                                                      | 24.7                                                                | 2.48                                   |
| $x=0.2$ | 5.39                             | 92.0                       | 1.69                                                      | 26.2                                                                | 4.45                                   |
| $x=0.3$ | 5.33                             | 91.0                       | 6.28                                                      | 48.6                                                                | 2.12                                   |
| $x=0.4$ | 4.9                              | 83.6                       | 4.37                                                      | 37.5                                                                | 3.36                                   |
| $x=0.5$ | 4.72                             | 80.5                       | 3.35                                                      | 35.2                                                                | 4.77                                   |
| $x=0.6$ | 4.65                             | 79.4                       | 0.88                                                      | 30.4                                                                | 5.03                                   |
| $x=0.8$ | 4.56                             | 77.8                       | 0.77                                                      | 15.1                                                                | 2.78                                   |
| $x=1$   |                                  |                            | 0.15                                                      | 12.5                                                                | 3.62                                   |

**Table S2** The Refined parameters and quality factors of  $\text{Cu}_3\text{SbSe}_{4(1-x)}\text{S}_{4x}$  ( $x=0-1$ ) samples.

| Nominal<br>composition | Space<br>group | $a$<br>(Å) | $c$<br>(Å) | $V$<br>(Å <sup>3</sup> ) | $R_p$<br>(%) | $R_{wp}$<br>(%) | $R_{exp}$<br>(%) | $Chi^2$ |
|------------------------|----------------|------------|------------|--------------------------|--------------|-----------------|------------------|---------|
| $x=0$                  | $\bar{I}4_2m$  | 5.6537     | 11.252     | 359.66                   | 5.97         | 8.06            | 2.35             | 11.8    |
| $x=0.1$                | $\bar{I}4_2m$  | 5.6505     | 11.246     | 359.06                   | 5.39         | 7.18            | 2.34             | 9.43    |
| $x=0.2$                | $\bar{I}4_2m$  | 5.6035     | 11.136     | 349.66                   | 6.47         | 8.77            | 4.82             | 3.11    |
| $x=0.3$                | $\bar{I}4_2m$  | 5.5718     | 11.106     | 344.78                   | 2.91         | 3.73            | 2.19             | 2.91    |
| $x=0.4$                | $\bar{I}4_2m$  | 5.5491     | 11.033     | 339.73                   | 5.77         | 7.40            | 4.64             | 2.55    |
| $x=0.5$                | $\bar{I}4_2m$  | 5.5238     | 11.005     | 335.79                   | 5.77         | 7.32            | 4.62             | 2.51    |
| $x=0.6$                | $\bar{I}4_2m$  | 5.4980     | 10.863     | 328.37                   | 7.43         | 9.80            | 4.69             | 4.37    |
| $x=0.8$                | $\bar{I}4_2m$  | 5.4492     | 10.806     | 320.87                   | 6.64         | 8.58            | 4.82             | 3.17    |
| $x=1$                  | $\bar{I}4_2m$  | 5.3866     | 10.750     | 311.92                   | 7.69         | 9.78            | 4.57             | 4.59    |

**Table S3** Parameters of  $\text{Cu}_3\text{SbSe}_{4(1-x)}\text{S}_{4x}(x=0-1)$  samples obtained by fitting the experimental lattice thermal conductivity data to the Debye-Callaway model using  $v=1991.2\text{m/s}$ , and  $\theta_D=131\text{K}$ , respectively [4–6] .

| Nominal composition | $\Gamma_m$ | $\Gamma_s$ | $\Gamma$ | $u$    | $\kappa_{\text{lat}}$<br>( $\text{W m}^{-1} \text{K}^{-1}$ ) | $\kappa_{\text{exp}}$<br>( $\text{W m}^{-1} \text{K}^{-1}$ ) |
|---------------------|------------|------------|----------|--------|--------------------------------------------------------------|--------------------------------------------------------------|
| $x=0$               | 0          | 0          | 0        | —      | 3.0                                                          | —                                                            |
| $x=0.1$             | 0.0171     | 0.0427     | 0.0597   | 1.5468 | 1.9335                                                       | 2.015                                                        |
| $x=0.2$             | 0.0323     | 0.0724     | 0.1047   | 2.0420 | 1.6387                                                       | 1.636                                                        |
| $x=0.3$             | 0.0452     | 0.0901     | 0.1353   | 2.3146 | 1.5074                                                       | 1.521                                                        |
| $x=0.4$             | 0.0552     | 0.0969     | 0.1521   | 2.4465 | 1.4504                                                       | 1.514                                                        |
| $x=0.5$             | 0.0616     | 0.0940     | 0.1556   | 2.4674 | 1.4417                                                       | 1.373                                                        |
| $x=0.6$             | 0.0635     | 0.0831     | 0.1466   | 2.3879 | 1.4752                                                       | 1.707                                                        |
| $x=0.7$             | 0.0684     | 0.0755     | 0.1438   | 2.3580 | 1.4882                                                       | —                                                            |
| $x=0.8$             | 0.0492     | 0.0449     | 0.0941   | 1.9014 | 1.7144                                                       | 1.880                                                        |
| $x=0.9$             | 0.0300     | 0.0220     | 0.0520   | 1.4093 | 2.0301                                                       | —                                                            |
| $x=1$               | 0          | 0          | 0        | —      | —                                                            | —                                                            |

## References

- [1] Mahan, G.; Bartkowiak, M. Wiedemann–Franz law at boundaries. *Appl. Phys. Lett.* **1999**, 74, 953–954.
- [2] Kim, H.S.; Gibbs, Z.M.; Tang, Y.G.; Wang, H.; Snyder, G.J. Characterization of Lorenz number with Seebeck coefficient measurement. *APL. Mater.* **2015**, 3, 041506.
- [3] Wang, B.Y.; Zheng, S.Q.; Wang, Q.; Li, Z.L.; Li, J.; Zhang, Z.P.; Wu, Y.; Zhu, B.S.; Wang, S.Y.; Chen, Y.X.; Chen, L.Q.; Chen, Z.-G. Synergistic modulation of power factor and thermal conductivity in  $\text{Cu}_3\text{SbSe}_4$  towards high thermoelectric performance. *Nano Energy* **2020**, 71, 104658.
- [4] Skoug, E.J.; Cain, J.D.; Morelli, D.T. High thermoelectric figure of merit in the  $\text{Cu}_3\text{SbSe}_4$ - $\text{Cu}_3\text{SbS}_4$  solid solution. *Appl. Phys. Lett.* **2011**, 98, 261911.
- [5] Yang, J.; Meisner, G.P.; Chen, L.D. Strain field fluctuation effects on lattice thermal conductivity of ZrNiSn-based thermoelectric compounds. *Appl. Phys. Lett.* **2004**, 85, 1140–1142.
- [6] Wan, C.L.; Pan, W.; Xu, Q.; Qin, Y.X.; Wang, J.D.; Qu, Z.X.; Fang, M.H. Effect of point defects on the thermal transport properties of  $(\text{La}_x\text{Gd}_{1-x})_2\text{Zr}_2\text{O}_7$ : Experiment and theoretical model. *Phys. Rev. B* **2006**, 74, 144109.
